# Supplementary material
Source: MDPI journal article supplement (https://www.mdpi.com/2304-6740/10/10/170)
Supplement: s1 [file s1]

*Supporting Information for*

**Judd-Ofelt analysis of high erbium content yttrium-aluminum and  
yttrium-scandium-aluminum garnet ceramics**

Vadim Yu. Zhmykhov <sup>a</sup>, Elena A. Dobretsova <sup>\*a</sup>, Marina S. Nikova <sup>b</sup>, Irina S. Chikulina <sup>b</sup>,  
Dmitry S. Vakalov <sup>b</sup>, Vitaly A. Tarala <sup>b</sup>, Vladimir S. Tsvetkov <sup>a</sup>, Yurii Pyrkov <sup>a</sup>, Sergey V.  
Kuznetsov <sup>a,c</sup>, Vladimir B. Tsvetkov <sup>a</sup>

*<sup>a</sup>Prokhorov General Physics Institute of the Russian Academy of Sciences, Moscow, Russia.*

*<sup>b</sup>North Caucasus Federal University, Scientific and Laboratory Complex Clean Room, Stavropol, Russia.*

*<sup>c</sup>Kazan Federal University.*

*Email: elenadobretsova89@gmail.com, eadobr@kapella.gpi.ru*

### ***Judd-Ofelt theory***

The Judd-Ofelt theory[1,2] is the most suitable one to characterize the intensities of electric-dipole  $4f$  transitions in lanthanide ions. This theory is correct both for well-crystalline and disordered media such as single crystals and glasses.

According to the Judd-Ofelt theory, the value of the oscillator strength for the  $J \rightarrow J'$  transition is determined by the expression:

$$f_{JJ'} = \left( \frac{8\pi^2 mc}{3hn^2 \bar{\lambda}(2J+1)} \right) [\chi^{ed} s_{JJ'}^{ed} + \chi^{md} s_{JJ'}^{md}] \quad (1)$$

where  $m$  is the mass of the electron,  $c$  is speed of light in vacuum,  $h$  is Planck's coefficient,  $\bar{\lambda}$  is a mean wavelength of inter-multiplet transition  $J \rightarrow J'$ ,  $n$  is a wavelength-dependent refractive index which is determined from Sellmeier's dispersion equation,[3,4]  $\chi^{ed} = n(n^2 + 2)^2/9$ ,  $\chi^{md} = n^3$ ,  $s_{JJ'}^{ed}$  and  $s_{JJ'}^{md}$  are the line strengths of the electric-dipole and magnetic-dipole transitions, respectively.

The line strength for the electric dipole transition is:

$$s_{JJ'}^{ed} = \sum_{t=2,4,6} \Omega_t |\langle 4f^N J \| U^t \| 4f^N J' \rangle|^2 \quad (2)$$

where  $|\langle 4f^N J \| U^t \| 4f^N J' \rangle|^2$  ( $t = 2, 4, 6$ ) are the doubly reduced matrix elements of the unit tensor operators  $U(t)$  of rank  $t$  ( $t = 2, 4, 6$ ) which depend only on angular momentum while are independent of the host, [5,6]  $\Omega_t$  are JO parameters.

Line strength for magnetic dipole transitions  $s_{JJ'}^{md}$  is calculated by the formula:

$$s_{JJ'}^{md} = \left( \frac{h}{4\pi mc} \right)^2 \Omega_t |\langle 4f^N J \| L + 2S \| 4f^N J' \rangle| \quad (3)$$

where  $L+2S$  is magneto-dipole transition operator  $J \rightarrow J'$ .

However, the values of the oscillator strengths  $f_{JJ'}$  of intermultiplet transitions  $J \rightarrow J'$  are determined experimentally by the formula:

$$f_{JJ'} = \frac{mc^2}{4\pi N \bar{\lambda}^2} \int \alpha(\lambda) d\lambda \quad (4)$$

where  $\int \alpha(\lambda) d\lambda = \Gamma$  is an integral absorption coefficient for transition between the ground and excited states of rare earth ions,  $N$  is an activator ion concentration.

The line strengths for the corresponding transitions of rare earth ions were determined experimentally from the values of the integral absorption coefficients by the formula:

$$s_{JJ'} = \frac{3hc(2J+1)}{8\pi^3 ke^2 N \bar{\lambda}} \frac{9n}{(n^2+2)^2} \int \alpha(\lambda) d\lambda \quad (5)$$

where  $e$  is the charge of the electron,  $k$  is Coulomb's constant. The factor  $[9n/(n^2+2)^2]$  represents the local field correction for electric dipole transition for the effective field for the ion in the dielectric host medium of isotropic refractive index  $n$ .

The system of linear equations with three variables  $\Omega_2$ ,  $\Omega_4$ ,  $\Omega_6$  is solved by the Gauss–Jordan method. [7]

The root mean square (*RMS*) of the line strength of the electric-dipole transition ( $S_{\text{calc}}$ ) is deviation between the experiment and calculated line strengths and determined by (6).

$$RMS \Delta s = \sqrt{\sum_{i=1}^M (s_{\text{exp}_i} - s_{\text{calc}_i})^2 / (M-3)} \quad (6)$$

where  $M$  is the number of experimental bands using in the above calculation.

The relative error is defined as:

$$RMS \text{ error} = \frac{RMS \Delta s}{RMS s} \times 100\% \quad (7)$$

where

$$RMS s = \sqrt{\sum_{i=1}^M s_{\text{exp}_i}^2 / M} \quad (8)$$

The deviation between the experiment and calculated absorption oscillator strengths,  $f_{\text{calc}}$ , and relative error are determined similarly.

The radiative transition probabilities  $A_{\text{rad}}(J \rightarrow J')$  is calculated for the transitions by using the following expression:

$$A_{\text{rad}}(J \rightarrow J') = \frac{64\pi^4 e^2}{3h(2J+1)\bar{\lambda}^3} \left( \left[ \frac{n(n^2+2)^2}{9} \right] s_{ed} + n^3 s_{md} \right) \quad (9)$$

The radiative lifetime  $\tau_{\text{rad}}$  for an excited states ( $J$ ) is calculated by:

$$\tau_{\text{rad}} = \frac{1}{\sum A_{\text{rad}}(J \rightarrow J')} \quad (10)$$

The emission cross section has been calculated by means of the Fuchtbauer–Ladenburg formula:

$$\sigma(J, J'; \lambda) = \frac{\lambda^2}{8\pi c n^2} \frac{\beta(J, J')}{\tau_j} g(\tilde{\nu}) \quad (11)$$

where  $\lambda$  is the wavelength at the peak emission,  $\beta(J, J')$  is the fluorescence branching ratio for the transition from the upper manifold  $J$  to the lower manifold  $J'$ ,  $\tau_j$  is the radiative lifetime of the excited manifold  $^4I_{13/2}$ , and  $g(\tilde{\nu})$  is the line-shape function. The line-shape function is obtained from the fluorescence spectrum using the following expression:

$$g(\tilde{\nu}) = \frac{I(\tilde{\nu})}{\int I(\tilde{\nu}) d\tilde{\nu}} \quad (12)$$

The intrinsic quantum yield ( $\eta$ ) is evaluated from the ratio of the fluorescence ( $\tau_{lum}^{exp}$ ) to radiative decay time ( $\tau_{rad}^{calc}$ ):

$$\eta = \frac{\tau_{lum}^{exp}}{\tau_{rad}^{calc}} \cdot 100 \% \quad (13)$$

The non-radiative multiphonon decay rates may be given by expression (14):

$$W_{NR} = 1/\tau_{lum}^{exp} - A_{rad}(J \rightarrow J') \quad (14)$$

## References

1. Judd, B.R. Optical Absorption Intensities of Rare-Earth Ions. *Physical Review* **1962**, *127*, 750–761, doi:10.1103/PhysRev.127.750.
2. Ofelt, G.S. Intensities of Crystal Spectra of Rare-Earth Ions. *J Chem Phys* **1962**, *37*, 511–520, doi:10.1063/1.1701366.
3. Shannon, R.D.; Shannon, R.C.; Medenbach, O.; Fischer, R.X. Refractive Index and Dispersion of Fluorides and Oxides. *J Phys Chem Ref Data* **2002**, *31*, 931–970, doi:10.1063/1.1497384.
4. Dobretsova, E.; Zhmykhov, V.; Kuznetsov, S.; Chikulina, I.; Nikova, M.; Tarala, V.; Vakalov, D.; Khmel'nitsky, R.; Pynenkov, A.; Nishchev, K.; et al. The Influence of the Sc<sup>3+</sup> Dopant on the Transmittance of (Y, Er)<sub>3</sub>Al<sub>5</sub>O<sub>12</sub> Ceramics. *Dalton Transactions* **2021**, *50*, 14252–14256, doi:10.1039/d1dt02419a.
5. Carnall, W.T.; Fields, P.R.; Rajnak, K. Electronic Energy Levels in the Trivalent Lanthanide Aquo Ions. I. Pr<sup>3+</sup>, Nd<sup>3+</sup>, Pm<sup>3+</sup>, Sm<sup>3+</sup>, Dy<sup>3+</sup>, Ho<sup>3+</sup>, Er<sup>3+</sup>, and Tm<sup>3+</sup>. *J Chem Phys* **1968**, *49*, 4424–4442, doi:10.1063/1.1669893.
6. Weber, M.J. Probabilities for Radiative and Nonradiative Decay of Er<sup>3+</sup> in LaF<sub>3</sub>. *Physical Review* **1967**, *157*, 262–272, doi:10.1103/PhysRev.157.262.

7. Batyaev, I.M.; Gasanov, R.Y.; Gasanova, O. V. Computer Processing of Electronic Absorption Spectra of Rare-Earth Elements in Inorganic Laser Media. *Optics and Spectroscopy (English translation of Optika i Spektroskopiya)* **2004**, *97*, 48–49, doi:10.1134/1.1781280.
